# Supplementary material
Source: PubMed Central journal article supplement (PMC3383455)
Supplement: NIHMS355438-supplement-01.pdf [file NIHMS355438-supplement-01.pdf]

Supplemental Table 1. Adjusted\* difference (95% confidence interval) in metabolic parameters by quintiles of percent plant protein intake among those not on phosphate binders, active vitamin D sterols or alkali supplements (n=2608)

|                                  | Quintile 1 | Quintile 2                | Quintile 3                | Quintile 4                | Quintile 5                           | Continuous per 10% increase in % plant protein | p-value <sup>‡</sup> |
|----------------------------------|------------|---------------------------|---------------------------|---------------------------|--------------------------------------|------------------------------------------------|----------------------|
| <b>Serum phosphate (mg/dL)</b>   | Ref        | 0.058<br>(-0.014, 0.131)  | 0.042<br>(-0.033, 0.117)  | 0.037<br>(-0.040, 0.113)  | 0.029<br>(-0.053, 0.111)             | 0.003<br>(-0.019, 0.026)                       | 0.77                 |
| <b>Log FGF23 (RU/mL)</b>         | Ref        | 0.012<br>(-0.069, 0.092)  | -0.010<br>(-0.093, 0.073) | -0.012<br>(-0.097, 0.074) | -0.053<br>(-0.144, 0.038)            | -0.023<br>(-0.048, 0.002)                      | 0.07                 |
| <b>24 urinary phosphate (mg)</b> | Ref        | 3.41<br>(-30.81, 37.62)   | -8.90<br>(-44.09, 26.29)  | 3.57<br>(-32.55, 39.69)   | -12.73<br>(-51.26, 25.80)            | -4.47<br>(-15.04, 6.10)                        | 0.41                 |
| <b>Log iPTH (pg/mL)</b>          | Ref        | -0.009<br>(-0.083, 0.064) | -0.044<br>(-0.120, 0.032) | -0.009<br>(-0.087, 0.069) | -0.018<br>(-0.101, 0.065)            | 0.001<br>(-0.022, 0.024)                       | 0.94                 |
| <b>Serum bicarbonate (mEq/L)</b> | Ref        | 0.157<br>(-0.216, 0.530)  | 0.190<br>(-0.193, 0.573)  | 0.280<br>(-0.113, 0.673)  | 0.443 <sup>†</sup><br>(0.023, 0.863) | 0.157<br>(0.042, 0.273)                        | 0.01                 |

\* all models adjusted for age, sex, race, diabetes, body mass index, eGFR, income, smoking, total energy, total protein, 24 hour urinary sodium, use of ACE inhibitors/ARBs, use of diuretics
